# Supplementary material for: Pemigatinib in previously treated solid tumors with activating FGFR1–FGFR3 alterations: phase 2 FIGHT-207 basket trial
Source: PubMed Central journal article supplement (PMC11186762; doi:10.1038/s41591-024-02934-7), 2024-05-06

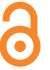

---

# **Pemigatinib in previously treated solid tumors with activating *FGFR1–FGFR3* alterations: phase 2 FIGHT-207 basket trial**

---

In the format provided by the authors and unedited

---

**Supplementary Table 1. Demographics and Baseline Clinical Characteristics of Patients With FGFR Alteration Not Centrally Confirmed**

|                                 | <b>Patients With <i>FGFR</i> Alteration<br/>Not Centrally Confirmed<br/>(n=4)</b> |
|---------------------------------|-----------------------------------------------------------------------------------|
| Age, median (range), y          | 44.0 (36–68)                                                                      |
| Women, n (%)                    | 1 (25.0)                                                                          |
| Race, n (%)                     |                                                                                   |
| White                           | 0                                                                                 |
| Black/African American          | 0                                                                                 |
| Asian                           | 4 (100.0)                                                                         |
| ECOG PS, n (%)                  |                                                                                   |
| 0                               | 1 (25.0)                                                                          |
| 1                               | 3 (75.0)                                                                          |
| 2                               | 0                                                                                 |
| Current stage, n (%)            |                                                                                   |
| Locally advanced                | 0                                                                                 |
| Metastatic                      | 4 (100.0)                                                                         |
| Prior radiation, n (%)          | 1 (25.0)                                                                          |
| Prior surgery for cancer, n (%) | 0                                                                                 |
| Local regional therapy, n (%)   | 0                                                                                 |
| Prior systemic therapy, n (%)   | 4 (100.0)                                                                         |
| 1                               | 2 (50.0)                                                                          |
| 2                               | 0                                                                                 |

|                         |          |
|-------------------------|----------|
| ≥3                      | 2 (50.0) |
| Solid tumor type, n (%) |          |
| Cervical                | 1 (25.0) |
| Cholangiocarcinoma      | 1 (25.0) |
| Gallbladder             | 1 (25.0) |
| Thymic                  | 1 (25.0) |

---

ECOG PS, Eastern Cooperative Oncology Group performance status; FGFR, fibroblast growth factor receptor; FISH, fluorescence in situ hybridization; NGS, next-generation sequencing.

*FGFR* alterations were detected by liquid NGS analysis or FISH assays with breakapart *FGFR* probes but could not be confirmed with central tissue NGS.

**Supplementary Table 2. Characteristics of Patients With Clinical Benefit\***

| Patient                              | Cohort | Tumor Type                      | <i>FGFR</i> Alteration <sup>†</sup>          | BOR | Best % Change From BL in Sum of Target Lesion Sizes | PFS, mo           |
|--------------------------------------|--------|---------------------------------|----------------------------------------------|-----|-----------------------------------------------------|-------------------|
| <b>Central nervous system tumors</b> |        |                                 |                                              |     |                                                     |                   |
| 44                                   | A      | Glioblastoma                    | <i>FGFR3-TACC3</i>                           | CR  | -100.0                                              | 20.2 <sup>‡</sup> |
| 45                                   | A      | Glioblastoma                    | <i>FGFR3-TACC3</i>                           | PR  | -100.0                                              | 8.4 <sup>‡</sup>  |
| 100                                  | C      | Diffuse astrocytoma             | <i>FGFR1</i> K656E                           | PR  | -80.7                                               | 8.0               |
| N/A <sup>§</sup>                     | C      | Low-grade pediatric type glioma | <i>FGFR1</i> N546K                           | SD  | N/A                                                 | 6.2 <sup>‡</sup>  |
| <b>Gynecologic cancer</b>            |        |                                 |                                              |     |                                                     |                   |
| 46                                   | A      | Cervical cancer                 | <i>FGFR3-TACC3</i>                           | PR  | -100.0                                              | 6.4               |
| 30                                   | A      | Cervical cancer                 | <i>FGFR3-TACC3</i>                           | PR  | -32.1                                               | 6.3               |
| <b>Pancreatic cancer</b>             |        |                                 |                                              |     |                                                     |                   |
| 43                                   | A      | Pancreatic adenocarcinoma       | <i>FGFR2-PPHLN1</i>                          | PR  | -72.1                                               | 8.4 <sup>‡</sup>  |
| 39                                   | A      | Pancreatic adenocarcinoma       | <i>FGFR2-KIAA1217</i><br><i>FGFR2-TBC1D5</i> | PR  | -54.9                                               | 8.9 <sup>‡</sup>  |
| 32                                   | A      | Pancreatic adenocarcinoma       | <i>FGFR2-KIAA1595</i>                        | PR  | -33.3                                               | 6.3 <sup>‡</sup>  |
| <b>Cholangiocarcinoma</b>            |        |                                 |                                              |     |                                                     |                   |
| 41                                   | A      | Cholangiocarcinoma              | <i>FGFR2-CROCC</i>                           | PR  | -64.6                                               | 6.2               |

| Patient                                | Cohort | Tumor Type                      | FGFR Alteration <sup>†</sup>     | BOR | Best % Change From BL in Sum of Target Lesion Sizes | PFS, mo           |
|----------------------------------------|--------|---------------------------------|----------------------------------|-----|-----------------------------------------------------|-------------------|
| 40                                     | A      | Cholangiocarcinoma              | <i>FGFR2-KIAA1598</i>            | PR  | -61.4                                               | 9.9               |
| 38                                     | A      | Cholangiocarcinoma              | <i>FGFR2-MRVI1</i>               | PR  | -53.5                                               | 8.8               |
| 79                                     | B      | Cholangiocarcinoma              | <i>FGFR2 C382R</i>               | PR  | -49.7                                               | 6.0               |
| 37                                     | A      | Cholangiocarcinoma              | <i>FGFR2-BICC1</i>               | PR  | -46.2                                               | 5.9 <sup>‡</sup>  |
| 35                                     | A      | Cholangiocarcinoma              | <i>FGFR2-RBM20</i>               | PR  | -43.2                                               | 10.5              |
| 78                                     | B      | Cholangiocarcinoma              | <i>FGFR2 I291, Y308 deletion</i> | PR  | -42.5                                               | 14.8              |
| 33                                     | A      | Cholangiocarcinoma              | <i>FGFR2-BICC1</i>               | PR  | -34.1                                               | 11.2 <sup>‡</sup> |
| 75                                     | B      | Cholangiocarcinoma              | <i>FGFR2 W290C</i>               | SD  | -34.0                                               | 10.5              |
| <b>Urothelial tract/bladder cancer</b> |        |                                 |                                  |     |                                                     |                   |
| 80                                     | B      | Urothelial tract/bladder cancer | <i>FGFR3 Y373C</i>               | PR  | -50.8                                               | 6.2 <sup>‡</sup>  |
| 68                                     | B      | Urothelial tract/bladder cancer | <i>FGFR3 G370C</i>               | SD  | -10.2                                               | 6.3 <sup>‡</sup>  |
| 64                                     | B      | Urothelial tract/bladder cancer | <i>FGFR3 G370C</i>               | SD  | 0                                                   | 6.2 <sup>‡</sup>  |
| <b>Breast cancer</b>                   |        |                                 |                                  |     |                                                     |                   |
| 99                                     | C      | Breast cancer                   | <i>FGFR2 Q774*</i>               | SD  | -25.0                                               | 18.7              |
| 97                                     | C      | Breast cancer                   | <i>FGFR1 I387V, FGFR3 R349C</i>  | SD  | -3.4                                                | 8.3 <sup>‡</sup>  |
| <b>Other cancers</b>                   |        |                                 |                                  |     |                                                     |                   |

| Patient | Cohort | Tumor Type                 | <i>FGFR</i> Alteration†         | BOR | Best % Change From BL in Sum of Target Lesion Sizes | PFS, mo |
|---------|--------|----------------------------|---------------------------------|-----|-----------------------------------------------------|---------|
| 69      | B      | Submandibular gland cancer | <i>FGFR3</i> S371C              | SD  | -12.5                                               | 8.3     |
| 17      | A      | Head and neck cancer       | <i>FGFR2</i> -<br><i>RBFOX2</i> | SD  | -7.7                                                | 8.1     |

BL, baseline; BOR, best overall response; CR, complete response; *FGFR*, fibroblast growth factor receptor; PFS, progression-free survival; PR, partial response; SD, stable disease.

\* Defined as objective response of any duration or stable disease ≥6 months.

† Includes *FGFR* alterations confirmed through both local and central genetic testing reports.

‡ Censored.

§ Postbaseline scan not available; therefore, the patient is not shown on the waterfall plot.

**Supplementary Table 3. All treatment-emergent adverse events occurring in the safety population (N=111)**

| Patients,* n (%)                       | Total (N=111) |                |         |         |         |
|----------------------------------------|---------------|----------------|---------|---------|---------|
|                                        | All Grades    | Grades 1 and 2 | Grade 3 | Grade 4 | Grade 5 |
| Laboratory values and investigations   |               |                |         |         |         |
| Blood creatinine increased             | 18 (16.2)     | 17 (15.3)      | 1 (0.9) | 0       | 0       |
| Weight decreased                       | 16 (14.4)     | 16 (14.4)      | 0       | 0       | 0       |
| Alanine aminotransferase increased     | 14 (12.6)     | 12 (10.8)      | 2 (1.8) | 0       | 0       |
| Aspartate aminotransferase increased   | 14 (12.6)     | 9 (8.1)        | 5 (4.5) | 0       | 0       |
| Lipase increased                       | 5 (4.5)       | 4 (3.6)        | 1 (0.9) | 0       | 0       |
| Blood alkaline phosphatase increased   | 4 (3.6)       | 4 (3.6)        | 0       | 0       | 0       |
| Blood bilirubin increased              | 4 (3.6)       | 2 (1.8)        | 2 (1.8) | 0       | 0       |
| Lymphocyte count decreased             | 3 (2.7)       | 1 (0.9)        | 2 (1.8) | 0       | 0       |
| Neutrophil count decreased             | 3 (2.7)       | 2 (1.8)        | 0       | 1 (0.9) | 0       |
| Gamma-glutamyltransferase increased    | 2 (1.8)       | 2 (1.8)        | 0       | 0       | 0       |
| Platelet count decreased               | 2 (1.8)       | 2 (1.8)        | 0       | 0       | 0       |
| White blood cell count decreased       | 2 (1.8)       | 2 (1.8)        | 0       | 0       | 0       |
| Amylase increased                      | 1 (0.9)       | 1 (0.9)        | 0       | 0       | 0       |
| Bilirubin conjugated increased         | 1 (0.9)       | 0              | 1 (0.9) | 0       | 0       |
| Blood chloride decreased               | 1 (0.9)       | 1 (0.9)        | 0       | 0       | 0       |
| Blood creatine phosphokinase increased | 1 (0.9)       | 0              | 1 (0.9) | 0       | 0       |

| Patients,* n (%)                         | Total (N=111) |                |          |         |         |
|------------------------------------------|---------------|----------------|----------|---------|---------|
|                                          | All Grades    | Grades 1 and 2 | Grade 3  | Grade 4 | Grade 5 |
| Blood magnesium decreased                | 1 (0.9)       | 1 (0.9)        | 0        | 0       | 0       |
| Blood phosphorus increased               | 1 (0.9)       | 1 (0.9)        | 0        | 0       | 0       |
| C-reactive protein increased             | 1 (0.9)       | 1 (0.9)        | 0        | 0       | 0       |
| Electrocardiogram QT prolonged           | 1 (0.9)       | 1 (0.9)        | 0        | 0       | 0       |
| Hemoglobin decreased                     | 1 (0.9)       | 1 (0.9)        | 0        | 0       | 0       |
| Hepatic enzyme increased                 | 1 (0.9)       | 0              | 1 (0.9)  | 0       | 0       |
| International normalized ratio increased | 1 (0.9)       | 1 (0.9)        | 0        | 0       | 0       |
| Neutrophil count increased               | 1 (0.9)       | 1 (0.9)        | 0        | 0       | 0       |
| Urine leukocyte esterase positive        | 1 (0.9)       | 1 (0.9)        | 0        | 0       | 0       |
| Vitamin D increased                      | 1 (0.9)       | 1 (0.9)        | 0        | 0       | 0       |
| Other TEAEs                              |               |                |          |         |         |
| Hyperphosphatemia                        | 93 (83.8)     | 92 (82.9)      | 1 (0.9)  | 0       | 0       |
| Stomatitis                               | 59 (53.2)     | 49 (44.1)      | 10 (9.0) | 0       | 0       |
| Alopecia                                 | 45 (40.5)     | 44 (39.6)      | 1 (0.9)  | 0       | 0       |
| Diarrhea                                 | 43 (38.7)     | 42 (37.8)      | 1 (0.9)  | 0       | 0       |
| Constipation                             | 37 (33.3)     | 36 (32.4)      | 1 (0.9)  | 0       | 0       |
| Dry mouth                                | 32 (28.8)     | 32 (28.8)      | 0        | 0       | 0       |
| Dysgeusia                                | 30 (27.0)     | 30 (27.0)      | 0        | 0       | 0       |
| Decreased appetite                       | 28 (25.2)     | 23 (20.7)      | 5 (4.5)  | 0       | 0       |
| Nausea                                   | 28 (25.2)     | 26 (23.4)      | 2 (1.8)  | 0       | 0       |
| Asthenia                                 | 27 (24.3)     | 22 (19.8)      | 5 (4.5)  | 0       | 0       |



| Patients,* n (%)                           | Total (N=111) |                |         |         |         |
|--------------------------------------------|---------------|----------------|---------|---------|---------|
|                                            | All Grades    | Grades 1 and 2 | Grade 3 | Grade 4 | Grade 5 |
| Palmar-plantar erythrodysesthesia syndrome | 26 (23.4)     | 20 (18.0)      | 6 (5.4) | 0       | 0       |
| Dry eye                                    | 25 (22.5)     | 22 (19.8)      | 3 (2.7) | 0       | 0       |
| Fatigue                                    | 24 (21.6)     | 19 (17.1)      | 5 (4.5) | 0       | 0       |
| Arthralgia                                 | 23 (20.7)     | 20 (18.0)      | 3 (2.7) | 0       | 0       |
| Vomiting                                   | 22 (19.8)     | 20 (18.0)      | 2 (1.8) | 0       | 0       |
| Dry skin                                   | 18 (16.2)     | 17 (15.3)      | 1 (0.9) | 0       | 0       |
| Abdominal pain                             | 17 (15.3)     | 14 (12.6)      | 3 (2.7) | 0       | 0       |
| Onychomadesis                              | 17 (15.3)     | 15 (13.5)      | 2 (1.8) | 0       | 0       |
| Urinary tract infection                    | 17 (15.3)     | 14 (12.6)      | 3 (2.7) | 0       | 0       |
| Anemia                                     | 14 (12.6)     | 13 (11.7)      | 1 (0.9) | 0       | 0       |
| Edema peripheral                           | 14 (12.6)     | 12 (10.8)      | 2 (1.8) | 0       | 0       |
| Paronychia                                 | 14 (12.6)     | 11 (9.9)       | 3 (2.7) | 0       | 0       |
| Nail discoloration                         | 13 (11.7)     | 12 (10.8)      | 1 (0.9) | 0       | 0       |
| Cough                                      | 11 (9.9)      | 11 (9.9)       | 0       | 0       | 0       |
| Hypophosphatemia                           | 10 (9.0)      | 6 (5.4)        | 4 (3.6) | 0       | 0       |
| Myalgia                                    | 10 (9.0)      | 8 (7.2)        | 2 (1.8) | 0       | 0       |
| Nail disorder                              | 10 (9.0)      | 9 (8.1)        | 1 (0.9) | 0       | 0       |
| Onycholysis                                | 10 (9.0)      | 9 (8.1)        | 1 (0.9) | 0       | 0       |
| Pain in extremity                          | 10 (9.0)      | 10 (9.0)       | 0       | 0       | 0       |
| Back pain                                  | 9 (8.1)       | 7 (6.3)        | 2 (1.8) | 0       | 0       |
| Dyspnea                                    | 9 (8.1)       | 9 (8.1)        | 0       | 0       | 0       |

| Patients,* n (%)          | Total (N=111) |                |         |         |         |
|---------------------------|---------------|----------------|---------|---------|---------|
|                           | All Grades    | Grades 1 and 2 | Grade 3 | Grade 4 | Grade 5 |
| Epistaxis                 | 9 (8.1)       | 9 (8.1)        | 0       | 0       | 0       |
| Hypercalcemia             | 9 (8.1)       | 6 (5.4)        | 1 (0.9) | 2 (1.8) | 0       |
| Serous retinal detachment | 9 (8.1)       | 7 (6.3)        | 2 (1.8) | 0       | 0       |
| Headache                  | 8 (7.2)       | 7 (6.3)        | 1 (0.9) | 0       | 0       |
| Pyrexia                   | 8 (7.2)       | 8 (7.2)        | 0       | 0       | 0       |
| Vision blurred            | 8 (7.2)       | 8 (7.2)        | 0       | 0       | 0       |
| Abdominal pain upper      | 7 (6.3)       | 7 (6.3)        | 0       | 0       | 0       |
| Conjunctivitis            | 7 (6.3)       | 7 (6.3)        | 0       | 0       | 0       |
| Dizziness                 | 7 (6.3)       | 7 (6.3)        | 0       | 0       | 0       |
| Hypomagnesemia            | 7 (6.3)       | 6 (5.4)        | 1 (0.9) | 0       | 0       |
| Hyponatremia              | 7 (6.3)       | 4 (3.6)        | 3 (2.7) | 0       | 0       |
| Dyspepsia                 | 6 (5.4)       | 6 (5.4)        | 0       | 0       | 0       |
| Hypotension               | 6 (5.4)       | 5 (4.5)        | 1 (0.9) | 0       | 0       |
| Pruritus                  | 6 (5.4)       | 6 (5.4)        | 0       | 0       | 0       |
| Urinary retention         | 6 (5.4)       | 6 (5.4)        | 0       | 0       | 0       |
| Dehydration               | 5 (4.5)       | 4 (3.6)        | 1 (0.9) | 0       | 0       |
| Malaise                   | 5 (4.5)       | 5 (4.5)        | 0       | 0       | 0       |
| Rash                      | 5 (4.5)       | 5 (4.5)        | 0       | 0       | 0       |
| Renal failure             | 5 (4.5)       | 4 (3.6)        | 1 (0.9) | 0       | 0       |
| Taste disorder            | 5 (4.5)       | 5 (4.5)        | 0       | 0       | 0       |
| Cellulitis                | 4 (3.6)       | 2 (1.8)        | 1 (0.9) | 1 (0.9) | 0       |

| Patients,* n (%)                      | Total (N=111) |                |         |         |         |
|---------------------------------------|---------------|----------------|---------|---------|---------|
|                                       | All Grades    | Grades 1 and 2 | Grade 3 | Grade 4 | Grade 5 |
| COVID-19                              | 4 (3.6)       | 4 (3.6)        | 0       | 0       | 0       |
| Cystitis                              | 4 (3.6)       | 4 (3.6)        | 0       | 0       | 0       |
| Dysuria                               | 4 (3.6)       | 4 (3.6)        | 0       | 0       | 0       |
| Erythema                              | 4 (3.6)       | 4 (3.6)        | 0       | 0       | 0       |
| Fall                                  | 4 (3.6)       | 4 (3.6)        | 0       | 0       | 0       |
| General physical health deterioration | 4 (3.6)       | 1 (0.9)        | 0       | 0       | 3 (2.7) |
| Hyperglycemia                         | 4 (3.6)       | 4 (3.6)        | 0       | 0       | 0       |
| Hypertension                          | 4 (3.6)       | 3 (2.7)        | 1 (0.9) | 0       | 0       |
| Hypokalemia                           | 4 (3.6)       | 2 (1.8)        | 2 (1.8) | 0       | 0       |
| Insomnia                              | 4 (3.6)       | 4 (3.6)        | 0       | 0       | 0       |
| Keratitis                             | 4 (3.6)       | 3 (2.7)        | 1 (0.9) | 0       | 0       |
| Muscle spasms                         | 4 (3.6)       | 4 (3.6)        | 0       | 0       | 0       |
| Onychalgia                            | 4 (3.6)       | 4 (3.6)        | 0       | 0       | 0       |
| Oropharyngeal pain                    | 4 (3.6)       | 4 (3.6)        | 0       | 0       | 0       |
| Thrombocytopenia                      | 4 (3.6)       | 4 (3.6)        | 0       | 0       | 0       |
| Vitamin D deficiency                  | 4 (3.6)       | 4 (3.6)        | 0       | 0       | 0       |
| Acute kidney injury                   | 3 (2.7)       | 2 (1.8)        | 1 (0.9) | 0       | 0       |
| Agitation                             | 3 (2.7)       | 3 (2.7)        | 0       | 0       | 0       |
| Ascites                               | 3 (2.7)       | 2 (1.8)        | 1 (0.9) | 0       | 0       |
| Cheilitis                             | 3 (2.7)       | 3 (2.7)        | 0       | 0       | 0       |
| Confusional state                     | 3 (2.7)       | 1 (0.9)        | 1 (0.9) | 0       | 1 (0.9) |

| Patients,* n (%)                | Total (N=111) |                |         |         |         |
|---------------------------------|---------------|----------------|---------|---------|---------|
|                                 | All Grades    | Grades 1 and 2 | Grade 3 | Grade 4 | Grade 5 |
| Depression                      | 3 (2.7)       | 3 (2.7)        | 0       | 0       | 0       |
| Dysphagia                       | 3 (2.7)       | 3 (2.7)        | 0       | 0       | 0       |
| Edema                           | 3 (2.7)       | 3 (2.7)        | 0       | 0       | 0       |
| Gastroesophageal reflux disease | 3 (2.7)       | 3 (2.7)        | 0       | 0       | 0       |
| Hot flush                       | 3 (2.7)       | 3 (2.7)        | 0       | 0       | 0       |
| Hypertrichosis                  | 3 (2.7)       | 3 (2.7)        | 0       | 0       | 0       |
| Hyperuricemia                   | 3 (2.7)       | 3 (2.7)        | 0       | 0       | 0       |
| Hypocalcemia                    | 3 (2.7)       | 3 (2.7)        | 0       | 0       | 0       |
| Lymphopenia                     | 3 (2.7)       | 1 (0.9)        | 1 (0.9) | 1 (0.9) | 0       |
| Muscular weakness               | 3 (2.7)       | 3 (2.7)        | 0       | 0       | 0       |
| Nail infection                  | 3 (2.7)       | 3 (2.7)        | 0       | 0       | 0       |
| Nasal dryness                   | 3 (2.7)       | 3 (2.7)        | 0       | 0       | 0       |
| Osteoarthritis                  | 3 (2.7)       | 3 (2.7)        | 0       | 0       | 0       |
| Paraesthesia                    | 3 (2.7)       | 2 (1.8)        | 1 (0.9) | 0       | 0       |
| Pollakiuria                     | 3 (2.7)       | 3 (2.7)        | 0       | 0       | 0       |
| Presyncope                      | 3 (2.7)       | 2 (1.8)        | 1 (0.9) | 0       | 0       |
| Punctate keratitis              | 3 (2.7)       | 2 (1.8)        | 1 (0.9) | 0       | 0       |
| Retinal detachment              | 3 (2.7)       | 2 (1.8)        | 1 (0.9) | 0       | 0       |
| Sciatica                        | 3 (2.7)       | 3 (2.7)        | 0       | 0       | 0       |
| Sepsis                          | 3 (2.7)       | 1 (0.9)        | 1 (0.9) | 0       | 1 (0.9) |
| Xerosis                         | 3 (2.7)       | 3 (2.7)        | 0       | 0       | 0       |

| Patients,* n (%)          | Total (N=111) |                |         |         |         |
|---------------------------|---------------|----------------|---------|---------|---------|
|                           | All Grades    | Grades 1 and 2 | Grade 3 | Grade 4 | Grade 5 |
| Abdominal distension      | 2 (1.8)       | 2 (1.8)        | 0       | 0       | 0       |
| Abdominal pain lower      | 2 (1.8)       | 2 (1.8)        | 0       | 0       | 0       |
| Anxiety                   | 2 (1.8)       | 2 (1.8)        | 0       | 0       | 0       |
| Aphthous ulcer            | 2 (1.8)       | 2 (1.8)        | 0       | 0       | 0       |
| Arthritis                 | 2 (1.8)       | 1 (0.9)        | 1 (0.9) | 0       | 0       |
| Balance disorder          | 2 (1.8)       | 1 (0.9)        | 1 (0.9) | 0       | 0       |
| Brain edema               | 2 (1.8)       | 2 (1.8)        | 0       | 0       | 0       |
| Cancer pain               | 2 (1.8)       | 2 (1.8)        | 0       | 0       | 0       |
| Cataract                  | 2 (1.8)       | 2 (1.8)        | 0       | 0       | 0       |
| Chronic kidney disease    | 2 (1.8)       | 0              | 2 (1.8) | 0       | 0       |
| Corneal erosion           | 2 (1.8)       | 2 (1.8)        | 0       | 0       | 0       |
| Cutaneous calcification   | 2 (1.8)       | 1 (0.9)        | 1 (0.9) | 0       | 0       |
| Delirium                  | 2 (1.8)       | 2 (1.8)        | 0       | 0       | 0       |
| Dysphonia                 | 2 (1.8)       | 2 (1.8)        | 0       | 0       | 0       |
| Face edema                | 2 (1.8)       | 2 (1.8)        | 0       | 0       | 0       |
| Hematemesis               | 2 (1.8)       | 1 (0.9)        | 1 (0.9) | 0       | 0       |
| Hematuria                 | 2 (1.8)       | 2 (1.8)        | 0       | 0       | 0       |
| Hepatic function abnormal | 2 (1.8)       | 2 (1.8)        | 0       | 0       | 0       |
| Hiccups                   | 2 (1.8)       | 2 (1.8)        | 0       | 0       | 0       |
| Hypoesthesia              | 2 (1.8)       | 2 (1.8)        | 0       | 0       | 0       |
| Maculopathy               | 2 (1.8)       | 2 (1.8)        | 0       | 0       | 0       |

| Patients,* n (%)              | Total (N=111) |                |         |         |         |
|-------------------------------|---------------|----------------|---------|---------|---------|
|                               | All Grades    | Grades 1 and 2 | Grade 3 | Grade 4 | Grade 5 |
| Musculoskeletal chest pain    | 2 (1.8)       | 2 (1.8)        | 0       | 0       | 0       |
| Nail dystrophy                | 2 (1.8)       | 2 (1.8)        | 0       | 0       | 0       |
| Nail toxicity                 | 2 (1.8)       | 2 (1.8)        | 0       | 0       | 0       |
| Nasal congestion              | 2 (1.8)       | 2 (1.8)        | 0       | 0       | 0       |
| Odynophagia                   | 2 (1.8)       | 2 (1.8)        | 0       | 0       | 0       |
| Onychoclasia                  | 2 (1.8)       | 1 (0.9)        | 1 (0.9) | 0       | 0       |
| Oral candidiasis              | 2 (1.8)       | 2 (1.8)        | 0       | 0       | 0       |
| Oral herpes                   | 2 (1.8)       | 2 (1.8)        | 0       | 0       | 0       |
| Pelvic pain                   | 2 (1.8)       | 2 (1.8)        | 0       | 0       | 0       |
| Peripheral sensory neuropathy | 2 (1.8)       | 2 (1.8)        | 0       | 0       | 0       |
| Pharyngitis                   | 2 (1.8)       | 2 (1.8)        | 0       | 0       | 0       |
| Pneumothorax                  | 2 (1.8)       | 1 (0.9)        | 1 (0.9) | 0       | 0       |
| Pulmonary embolism            | 2 (1.8)       | 0              | 2 (1.8) | 0       | 0       |
| Rectal hemorrhage             | 2 (1.8)       | 2 (1.8)        | 0       | 0       | 0       |
| Skin exfoliation              | 2 (1.8)       | 2 (1.8)        | 0       | 0       | 0       |
| Somnolence                    | 2 (1.8)       | 2 (1.8)        | 0       | 0       | 0       |
| Subretinal fluid              | 2 (1.8)       | 2 (1.8)        | 0       | 0       | 0       |
| Visual impairment             | 2 (1.8)       | 2 (1.8)        | 0       | 0       | 0       |
| Xerophthalmia                 | 2 (1.8)       | 2 (1.8)        | 0       | 0       | 0       |
| Abdominal discomfort          | 1 (0.9)       | 1 (0.9)        | 0       | 0       | 0       |
| Abdominal wall hematoma       | 1 (0.9)       | 1 (0.9)        | 0       | 0       | 0       |

| Patients,* n (%)                 | Total (N=111) |                |         |         |         |
|----------------------------------|---------------|----------------|---------|---------|---------|
|                                  | All Grades    | Grades 1 and 2 | Grade 3 | Grade 4 | Grade 5 |
| Abdominal wall infection         | 1 (0.9)       | 1 (0.9)        | 0       | 0       | 0       |
| Acute respiratory failure        | 1 (0.9)       | 0              | 0       | 0       | 1 (0.9) |
| Age-related macular degeneration | 1 (0.9)       | 1 (0.9)        | 0       | 0       | 0       |
| Ageusia                          | 1 (0.9)       | 1 (0.9)        | 0       | 0       | 0       |
| Aphasia                          | 1 (0.9)       | 1 (0.9)        | 0       | 0       | 0       |
| Asthenopia                       | 1 (0.9)       | 1 (0.9)        | 0       | 0       | 0       |
| Ataxia                           | 1 (0.9)       | 0              | 1 (0.9) | 0       | 0       |
| Atelectasis                      | 1 (0.9)       | 1 (0.9)        | 0       | 0       | 0       |
| Bacteremia                       | 1 (0.9)       | 1 (0.9)        | 0       | 0       | 0       |
| Biliary obstruction              | 1 (0.9)       | 0              | 1 (0.9) | 0       | 0       |
| Blepharitis                      | 1 (0.9)       | 1 (0.9)        | 0       | 0       | 0       |
| Bradycardia                      | 1 (0.9)       | 1 (0.9)        | 0       | 0       | 0       |
| Bursitis                         | 1 (0.9)       | 1 (0.9)        | 0       | 0       | 0       |
| Cartilage injury                 | 1 (0.9)       | 1 (0.9)        | 0       | 0       | 0       |
| Cell death                       | 1 (0.9)       | 1 (0.9)        | 0       | 0       | 0       |
| Chest discomfort                 | 1 (0.9)       | 1 (0.9)        | 0       | 0       | 0       |
| Chills                           | 1 (0.9)       | 1 (0.9)        | 0       | 0       | 0       |
| Cholangitis                      | 1 (0.9)       | 0              | 1 (0.9) | 0       | 0       |
| Cholestasis                      | 1 (0.9)       | 0              | 1 (0.9) | 0       | 0       |
| Cognitive disorder               | 1 (0.9)       | 1 (0.9)        | 0       | 0       | 0       |
| Conjunctival edema               | 1 (0.9)       | 1 (0.9)        | 0       | 0       | 0       |

| Patients,* n (%)      | Total (N=111) |                |         |         |         |
|-----------------------|---------------|----------------|---------|---------|---------|
|                       | All Grades    | Grades 1 and 2 | Grade 3 | Grade 4 | Grade 5 |
| Contusion             | 1 (0.9)       | 1 (0.9)        | 0       | 0       | 0       |
| Corneal disorder      | 1 (0.9)       | 1 (0.9)        | 0       | 0       | 0       |
| Corneal infection     | 1 (0.9)       | 1 (0.9)        | 0       | 0       | 0       |
| Cystitis noninfective | 1 (0.9)       | 1 (0.9)        | 0       | 0       | 0       |
| Dermatitis            | 1 (0.9)       | 1 (0.9)        | 0       | 0       | 0       |
| Diplopia              | 1 (0.9)       | 1 (0.9)        | 0       | 0       | 0       |
| Dry throat            | 1 (0.9)       | 1 (0.9)        | 0       | 0       | 0       |
| Early satiety         | 1 (0.9)       | 1 (0.9)        | 0       | 0       | 0       |
| Epilepsy              | 1 (0.9)       | 0              | 1 (0.9) | 0       | 0       |
| Erectile dysfunction  | 1 (0.9)       | 1 (0.9)        | 0       | 0       | 0       |
| Esophagitis           | 1 (0.9)       | 1 (0.9)        | 0       | 0       | 0       |
| Eye discharge         | 1 (0.9)       | 1 (0.9)        | 0       | 0       | 0       |
| Eye disorder          | 1 (0.9)       | 1 (0.9)        | 0       | 0       | 0       |
| Eye hemorrhage        | 1 (0.9)       | 1 (0.9)        | 0       | 0       | 0       |
| Eye infection         | 1 (0.9)       | 1 (0.9)        | 0       | 0       | 0       |
| Eye irritation        | 1 (0.9)       | 1 (0.9)        | 0       | 0       | 0       |
| Eyelid ptosis         | 1 (0.9)       | 1 (0.9)        | 0       | 0       | 0       |
| Fascial infection     | 1 (0.9)       | 0              | 1 (0.9) | 0       | 0       |
| Febrile neutropenia   | 1 (0.9)       | 0              | 1 (0.9) | 0       | 0       |
| Flank pain            | 1 (0.9)       | 1 (0.9)        | 0       | 0       | 0       |
| Foot fracture         | 1 (0.9)       | 1 (0.9)        | 0       | 0       | 0       |



| Patients,* n (%)                    | Total (N=111) |                |         |         |         |
|-------------------------------------|---------------|----------------|---------|---------|---------|
|                                     | All Grades    | Grades 1 and 2 | Grade 3 | Grade 4 | Grade 5 |
| Fungal skin infection               | 1 (0.9)       | 1 (0.9)        | 0       | 0       | 0       |
| Gastritis                           | 1 (0.9)       | 1 (0.9)        | 0       | 0       | 0       |
| Gastrointestinal pain               | 1 (0.9)       | 1 (0.9)        | 0       | 0       | 0       |
| Gastrointestinal stoma complication | 1 (0.9)       | 1 (0.9)        | 0       | 0       | 0       |
| Gastrostomy failure                 | 1 (0.9)       | 1 (0.9)        | 0       | 0       | 0       |
| Genital dysesthesia                 | 1 (0.9)       | 1 (0.9)        | 0       | 0       | 0       |
| Glossitis                           | 1 (0.9)       | 1 (0.9)        | 0       | 0       | 0       |
| Granulomatous dermatitis            | 1 (0.9)       | 1 (0.9)        | 0       | 0       | 0       |
| Growth of eyelashes                 | 1 (0.9)       | 1 (0.9)        | 0       | 0       | 0       |
| Hemoptysis                          | 1 (0.9)       | 1 (0.9)        | 0       | 0       | 0       |
| Herpes simplex reactivation         | 1 (0.9)       | 1 (0.9)        | 0       | 0       | 0       |
| Hydronephrosis                      | 1 (0.9)       | 0              | 1 (0.9) | 0       | 0       |
| Hyperammonemia                      | 1 (0.9)       | 1 (0.9)        | 0       | 0       | 0       |
| Hyperbilirubinemia                  | 1 (0.9)       | 1 (0.9)        | 0       | 0       | 0       |
| Hyperkalemia                        | 1 (0.9)       | 1 (0.9)        | 0       | 0       | 0       |
| Hyperparathyroidism                 | 1 (0.9)       | 1 (0.9)        | 0       | 0       | 0       |
| Hypertransaminasemia                | 1 (0.9)       | 0              | 1 (0.9) | 0       | 0       |
| Hypoalbuminemia                     | 1 (0.9)       | 1 (0.9)        | 0       | 0       | 0       |
| Hypoglycemia                        | 1 (0.9)       | 1 (0.9)        | 0       | 0       | 0       |
| Hypothyroidism                      | 1 (0.9)       | 1 (0.9)        | 0       | 0       | 0       |
| Hypoxia                             | 1 (0.9)       | 1 (0.9)        | 0       | 0       | 0       |

| Patients,* n (%)         | Total (N=111) |                |         |         |         |
|--------------------------|---------------|----------------|---------|---------|---------|
|                          | All Grades    | Grades 1 and 2 | Grade 3 | Grade 4 | Grade 5 |
| Implant site infection   | 1 (0.9)       | 0              | 1 (0.9) | 0       | 0       |
| Inadequate analgesia     | 1 (0.9)       | 0              | 1 (0.9) | 0       | 0       |
| Infection                | 1 (0.9)       | 1 (0.9)        | 0       | 0       | 0       |
| Infusion site laceration | 1 (0.9)       | 1 (0.9)        | 0       | 0       | 0       |
| Infusion site reaction   | 1 (0.9)       | 1 (0.9)        | 0       | 0       | 0       |
| Intermenstrual bleeding  | 1 (0.9)       | 1 (0.9)        | 0       | 0       | 0       |
| Intestinal obstruction   | 1 (0.9)       | 0              | 1 (0.9) | 0       | 0       |
| Iron deficiency anemia   | 1 (0.9)       | 1 (0.9)        | 0       | 0       | 0       |
| Jaundice                 | 1 (0.9)       | 0              | 1 (0.9) | 0       | 0       |
| Joint stiffness          | 1 (0.9)       | 1 (0.9)        | 0       | 0       | 0       |
| Keratopathy              | 1 (0.9)       | 1 (0.9)        | 0       | 0       | 0       |
| Lacrimal disorder        | 1 (0.9)       | 1 (0.9)        | 0       | 0       | 0       |
| Lacrimation increased    | 1 (0.9)       | 1 (0.9)        | 0       | 0       | 0       |
| Laryngeal inflammation   | 1 (0.9)       | 1 (0.9)        | 0       | 0       | 0       |
| Lip infection            | 1 (0.9)       | 1 (0.9)        | 0       | 0       | 0       |
| Liver disorder           | 1 (0.9)       | 0              | 1 (0.9) | 0       | 0       |
| Localized edema          | 1 (0.9)       | 1 (0.9)        | 0       | 0       | 0       |
| Long QT syndrome         | 1 (0.9)       | 0              | 1 (0.9) | 0       | 0       |
| Macular edema            | 1 (0.9)       | 1 (0.9)        | 0       | 0       | 0       |
| Macular pseudohole       | 1 (0.9)       | 1 (0.9)        | 0       | 0       | 0       |
| Mastitis                 | 1 (0.9)       | 1 (0.9)        | 0       | 0       | 0       |

| Patients,* n (%)                     | Total (N=111) |                |         |         |         |
|--------------------------------------|---------------|----------------|---------|---------|---------|
|                                      | All Grades    | Grades 1 and 2 | Grade 3 | Grade 4 | Grade 5 |
| Medical device site pain             | 1 (0.9)       | 1 (0.9)        | 0       | 0       | 0       |
| Memory impairment                    | 1 (0.9)       | 1 (0.9)        | 0       | 0       | 0       |
| Metastases to central nervous system | 1 (0.9)       | 0              | 1 (0.9) | 0       | 0       |
| Microcytic anemia                    | 1 (0.9)       | 0              | 1 (0.9) | 0       | 0       |
| Mucosal inflammation                 | 1 (0.9)       | 1 (0.9)        | 0       | 0       | 0       |
| Musculoskeletal pain                 | 1 (0.9)       | 1 (0.9)        | 0       | 0       | 0       |
| Nail ridging                         | 1 (0.9)       | 1 (0.9)        | 0       | 0       | 0       |
| Nasopharyngitis                      | 1 (0.9)       | 1 (0.9)        | 0       | 0       | 0       |
| Neck pain                            | 1 (0.9)       | 1 (0.9)        | 0       | 0       | 0       |
| Nephrolithiasis                      | 1 (0.9)       | 1 (0.9)        | 0       | 0       | 0       |
| Neuropathy peripheral                | 1 (0.9)       | 1 (0.9)        | 0       | 0       | 0       |
| Neutropenia                          | 1 (0.9)       | 0              | 1 (0.9) | 0       | 0       |
| Obstruction gastric                  | 1 (0.9)       | 0              | 1 (0.9) | 0       | 0       |
| Ocular toxicity                      | 1 (0.9)       | 1 (0.9)        | 0       | 0       | 0       |
| Oral discomfort                      | 1 (0.9)       | 1 (0.9)        | 0       | 0       | 0       |
| Oral fungal infection                | 1 (0.9)       | 1 (0.9)        | 0       | 0       | 0       |
| Otitis externa                       | 1 (0.9)       | 1 (0.9)        | 0       | 0       | 0       |
| Otorrhea                             | 1 (0.9)       | 1 (0.9)        | 0       | 0       | 0       |
| Palpitations                         | 1 (0.9)       | 1 (0.9)        | 0       | 0       | 0       |
| Pancreatic failure                   | 1 (0.9)       | 1 (0.9)        | 0       | 0       | 0       |
| Pancreatitis                         | 1 (0.9)       | 0              | 1 (0.9) | 0       | 0       |

| Patients,* n (%)            | Total (N=111) |                |         |         |         |
|-----------------------------|---------------|----------------|---------|---------|---------|
|                             | All Grades    | Grades 1 and 2 | Grade 3 | Grade 4 | Grade 5 |
| Parotitis                   | 1 (0.9)       | 0              | 1 (0.9) | 0       | 0       |
| Pathological fracture       | 1 (0.9)       | 0              | 1 (0.9) | 0       | 0       |
| Penile pain                 | 1 (0.9)       | 1 (0.9)        | 0       | 0       | 0       |
| Perineal pain               | 1 (0.9)       | 1 (0.9)        | 0       | 0       | 0       |
| Peripheral artery occlusion | 1 (0.9)       | 1 (0.9)        | 0       | 0       | 0       |
| Peripheral ischemia         | 1 (0.9)       | 0              | 1 (0.9) | 0       | 0       |
| Peripheral swelling         | 1 (0.9)       | 1 (0.9)        | 0       | 0       | 0       |
| Photophobia                 | 1 (0.9)       | 1 (0.9)        | 0       | 0       | 0       |
| Photopsia                   | 1 (0.9)       | 1 (0.9)        | 0       | 0       | 0       |
| Pigmentation disorder       | 1 (0.9)       | 1 (0.9)        | 0       | 0       | 0       |
| Pneumonia                   | 1 (0.9)       | 0              | 1 (0.9) | 0       | 0       |
| Post procedural hematuria   | 1 (0.9)       | 0              | 1 (0.9) | 0       | 0       |
| Procedural pain             | 1 (0.9)       | 1 (0.9)        | 0       | 0       | 0       |
| Pseudomonas infection       | 1 (0.9)       | 1 (0.9)        | 0       | 0       | 0       |
| Psychomotor skills impaired | 1 (0.9)       | 1 (0.9)        | 0       | 0       | 0       |
| Pyelonephritis acute        | 1 (0.9)       | 0              | 1 (0.9) | 0       | 0       |
| Rash erythematous           | 1 (0.9)       | 1 (0.9)        | 0       | 0       | 0       |
| Rash macular                | 1 (0.9)       | 1 (0.9)        | 0       | 0       | 0       |
| Renal colic                 | 1 (0.9)       | 1 (0.9)        | 0       | 0       | 0       |
| Renal impairment            | 1 (0.9)       | 1 (0.9)        | 0       | 0       | 0       |
| Retinal cyst                | 1 (0.9)       | 1 (0.9)        | 0       | 0       | 0       |

| Patients,* n (%)                        | Total (N=111) |                |         |         |         |
|-----------------------------------------|---------------|----------------|---------|---------|---------|
|                                         | All Grades    | Grades 1 and 2 | Grade 3 | Grade 4 | Grade 5 |
| Retinal hemorrhage                      | 1 (0.9)       | 1 (0.9)        | 0       | 0       | 0       |
| Retinopathy                             | 1 (0.9)       | 1 (0.9)        | 0       | 0       | 0       |
| Rhabdomyolysis                          | 1 (0.9)       | 0              | 1 (0.9) | 0       | 0       |
| Rhinitis                                | 1 (0.9)       | 1 (0.9)        | 0       | 0       | 0       |
| Rhinorrhea                              | 1 (0.9)       | 1 (0.9)        | 0       | 0       | 0       |
| Seizure                                 | 1 (0.9)       | 1 (0.9)        | 0       | 0       | 0       |
| Sinus pain                              | 1 (0.9)       | 1 (0.9)        | 0       | 0       | 0       |
| Sinus tachycardia                       | 1 (0.9)       | 1 (0.9)        | 0       | 0       | 0       |
| Sinusitis                               | 1 (0.9)       | 0              | 1 (0.9) | 0       | 0       |
| Skin abrasion                           | 1 (0.9)       | 1 (0.9)        | 0       | 0       | 0       |
| Skin infection                          | 1 (0.9)       | 1 (0.9)        | 0       | 0       | 0       |
| Skin irritation                         | 1 (0.9)       | 1 (0.9)        | 0       | 0       | 0       |
| Skin ulcer                              | 1 (0.9)       | 0              | 1 (0.9) | 0       | 0       |
| Sleep disorder                          | 1 (0.9)       | 1 (0.9)        | 0       | 0       | 0       |
| Speech disorder                         | 1 (0.9)       | 1 (0.9)        | 0       | 0       | 0       |
| Spinal cord compression                 | 1 (0.9)       | 0              | 1 (0.9) | 0       | 0       |
| Stent malfunction                       | 1 (0.9)       | 0              | 1 (0.9) | 0       | 0       |
| Stevens-Johnson syndrome                | 1 (0.9)       | 0              | 1 (0.9) | 0       | 0       |
| Swollen tongue                          | 1 (0.9)       | 1 (0.9)        | 0       | 0       | 0       |
| Syncope                                 | 1 (0.9)       | 0              | 1 (0.9) | 0       | 0       |
| Systemic inflammatory response syndrome | 1 (0.9)       | 1 (0.9)        | 0       | 0       | 0       |

| Patients,* n (%)                  | Total (N=111) |                |         |         |         |
|-----------------------------------|---------------|----------------|---------|---------|---------|
|                                   | All Grades    | Grades 1 and 2 | Grade 3 | Grade 4 | Grade 5 |
| Tinnitus                          | 1 (0.9)       | 1 (0.9)        | 0       | 0       | 0       |
| Tongue discomfort                 | 1 (0.9)       | 1 (0.9)        | 0       | 0       | 0       |
| Tonsillitis                       | 1 (0.9)       | 1 (0.9)        | 0       | 0       | 0       |
| Toothache                         | 1 (0.9)       | 1 (0.9)        | 0       | 0       | 0       |
| Tremor                            | 1 (0.9)       | 1 (0.9)        | 0       | 0       | 0       |
| Trichiasis                        | 1 (0.9)       | 1 (0.9)        | 0       | 0       | 0       |
| Ulcerative keratitis              | 1 (0.9)       | 0              | 1 (0.9) | 0       | 0       |
| Upper respiratory tract infection | 1 (0.9)       | 1 (0.9)        | 0       | 0       | 0       |
| Ureteric obstruction              | 1 (0.9)       | 0              | 1 (0.9) | 0       | 0       |
| Urinary hesitation                | 1 (0.9)       | 1 (0.9)        | 0       | 0       | 0       |
| Urinary incontinence              | 1 (0.9)       | 1 (0.9)        | 0       | 0       | 0       |
| Urinary tract obstruction         | 1 (0.9)       | 0              | 1 (0.9) | 0       | 0       |
| Vaccination site pain             | 1 (0.9)       | 1 (0.9)        | 0       | 0       | 0       |
| Vascular access site pain         | 1 (0.9)       | 1 (0.9)        | 0       | 0       | 0       |
| Vertigo                           | 1 (0.9)       | 1 (0.9)        | 0       | 0       | 0       |
| Visual acuity reduced             | 1 (0.9)       | 1 (0.9)        | 0       | 0       | 0       |
| Vulval ulceration                 | 1 (0.9)       | 1 (0.9)        | 0       | 0       | 0       |
| Vulvitis                          | 1 (0.9)       | 1 (0.9)        | 0       | 0       | 0       |
| Vulvovaginal candidiasis          | 1 (0.9)       | 1 (0.9)        | 0       | 0       | 0       |
| Xeroderma                         | 1 (0.9)       | 1 (0.9)        | 0       | 0       | 0       |

MedDRA, Medical Dictionary for Regulatory Activities; TEAE, treatment-emergent adverse event.

\* Patients were counted once under each MedDRA preferred term.

**Supplementary Table 4. Characteristics of Patients With Concurrent *FGFR* Amplifications**

| Patient | Cohort | Histology                                                | Enrolled <i>FGFR</i> Alteration           | Amplified <i>FGFR</i> Gene* | Copy Number | BOR | PFS, mo          |
|---------|--------|----------------------------------------------------------|-------------------------------------------|-----------------------------|-------------|-----|------------------|
| 12      | A      | Endometrial cancer                                       | <i>BAG4-FGFR1</i>                         | <i>FGFR1</i>                | 12          | SD  | 4.1              |
| 84      | C      | Cholangiocarcinoma                                       | <i>FGFR3</i> K659R                        | <i>FGFR3</i>                | 12          | PD  | 2.1              |
| 86      | C      | Breast cancer                                            | <i>FGFR1</i> N546K                        | <i>FGFR1</i>                | 8           | PD  | 1.4              |
| 98      | C      | Gastroesophageal/<br>gastroesophageal<br>junction cancer | <i>FGFR2</i> E769fs                       | <i>FGFR2</i>                | 48          | SD  | 6.2              |
| 97      | C      | Breast cancer                                            | <i>FGFR1</i> I387V;<br><i>FGFR3</i> R439C | <i>FGFR1</i>                | 18          | SD  | 8.3 <sup>†</sup> |
| 3       | A      | Esophageal cancer                                        | <i>FGFR1-WHSC1L1</i>                      | <i>FGFR2</i>                | 15          | PD  | 1.6              |
| 23      | A      | Non-small cell lung<br>cancer                            | <i>FGFR3-TACC3</i>                        | <i>FGFR1</i>                | 8           | SD  | 5.2              |
| 21      | A      | Cancer of unknown<br>primary                             | <i>FGFR2</i><br>rearrangement             | <i>FGFR3</i>                | 9           | SD  | 3.6              |
| 49      | B      | Uterine cancer                                           | <i>FGFR2</i> V395D                        | <i>FGFR1</i>                | 10          | PD  | 1.2              |

BOR, best overall response; *FGFR*, fibroblast growth factor receptor; PD, progressive disease; PFS, progression-free survival; SD, stable disease.

\* *FGFR* amplification defined as copy number  $\geq 6$

<sup>†</sup> Censored.

**Supplementary Table 5. Pooled Analysis of Baseline Co-Alterations Associated with Response Across Histologies in Tumor Tissue From Patients in FIGHT-207 and FIGHT-**

**101**

| Gene           | N Altered | Objective Response, n/N (%) |            | Odds Ratio (95% CI) | P*               | Q†    |
|----------------|-----------|-----------------------------|------------|---------------------|------------------|-------|
|                |           | Altered                     | Unaltered  |                     |                  |       |
| <i>BAP1</i>    | 11        | 8/11 (73)                   | 18/81 (16) | 13.4 (2.8, 88.6)    | <b>&lt;0.001</b> | 0.017 |
| <i>TP53</i>    | 27        | 0/27 (0)                    | 21/65 (32) | 0 (0, 0.4)          | <b>&lt;0.001</b> | 0.017 |
| <i>APC</i>     | 7         | 0/7 (0)                     | 21/85 (25) | 0 (0, 2.3)          | 0.34             | >0.99 |
| <i>RB1</i>     | 7         | 0/7 (0)                     | 21/85 (25) | 0 (0, 2.3)          | 0.34             | >0.99 |
| <i>PIK3CA</i>  | 16        | 2/16 (13)                   | 19/76 (25) | 0.4 (0.04, 2.2)     | 0.35             | >0.99 |
| <i>MCL1</i>    | 3         | 1/3 (33)                    | 20/89 (23) | 1.7 (0.03, 34.5)    | 0.54             | >0.99 |
| <i>EGFR</i>    | 3         | 1/3 (33)                    | 20/89 (23) | 1.7 (0.03, 34.5)    | 0.54             | >0.99 |
| <i>PPP2R1A</i> | 3         | 1/3 (33)                    | 20/89 (23) | 1.7 (0.03, 34.5)    | 0.54             | >0.99 |
| <i>RBM10</i>   | 3         | 1/3 (33)                    | 20/89 (23) | 1.7 (0.03, 34.5)    | 0.54             | >0.99 |
| <i>FGF4</i>    | 3         | 1/3 (33)                    | 20/89 (23) | 1.7 (0.03, 34.5)    | 0.54             | >0.99 |
| <i>MTAP</i>    | 20        | 3/20 (15)                   | 18/72 (25) | 0.5 (0.09, 2.2)     | 0.55             | >0.99 |
| <i>MDM2</i>    | 4         | 0/4 (0)                     | 21/88 (24) | 0 (0, 5.2)          | 0.57             | >0.99 |
| <i>SMAD4</i>   | 4         | 0/4 (0)                     | 21/88 (24) | 0 (0, 5.2)          | 0.57             | >0.99 |
| <i>CREBBP</i>  | 4         | 0/4 (0)                     | 21/88 (24) | 0 (0, 5.2)          | 0.57             | >0.99 |
| <i>PIK3R1</i>  | 4         | 0/4 (0)                     | 21/88 (24) | 0 (0, 5.2)          | 0.57             | >0.99 |
| <i>CDKN1A</i>  | 4         | 0/4 (0)                     | 21/88 (24) | 0 (0, 5.2)          | 0.57             | >0.99 |
| <i>TSC1</i>    | 5         | 0/5 (0)                     | 21/87 (24) | 0 (0, 3.7)          | 0.59             | >0.99 |
| <i>ARID1A</i>  | 8         | 1/8 (13)                    | 20/84 (24) | 0.5 (0.01, 4.0)     | 0.68             | >0.99 |



|               |    |           |            |                  |       |       |
|---------------|----|-----------|------------|------------------|-------|-------|
| <i>PTEN</i>   | 9  | 1/9 (11)  | 20/83 (24) | 0.4 (0.01, 3.3)  | 0.68  | >0.99 |
| <i>MLL2</i>   | 10 | 3/10 (30) | 18/82 (22) | 1.5 (0.2, 7.5)   | 0.69  | >0.99 |
| <i>KDM6A</i>  | 11 | 3/11 (27) | 18/81 (22) | 1.3 (0.2, 6.2)   | 0.71  | >0.99 |
| <i>TERT</i>   | 27 | 7/27 (26) | 14/65 (22) | 1.3 (0.4, 4.0)   | 0.79  | >0.99 |
| <i>DNMT3A</i> | 4  | 1/4 (25)  | 20/88 (23) | 1.1 (0.02, 15.0) | >0.99 | >0.99 |
| <i>STAG2</i>  | 9  | 2/9 (22)  | 19/83 (23) | 1.0 (0.09, 5.7)  | >0.99 | >0.99 |
| <i>ATM</i>    | 3  | 0/3 (0)   | 21/89 (24) | 0 (0, 8.3)       | >0.99 | >0.99 |
| <i>MYC</i>    | 6  | 1/6 (17)  | 20/86 (23) | 0.7 (0.01, 6.4)  | >0.99 | >0.99 |
| <i>ARFRP1</i> | 3  | 0/3 (0)   | 21/89 (24) | 0 (0, 8.3)       | >0.99 | >0.99 |
| <i>ZNF217</i> | 3  | 0/3 (0)   | 21/89 (24) | 0 (0, 8.3)       | >0.99 | >0.99 |
| <i>BCL2L1</i> | 3  | 0/3 (0)   | 21/89 (24) | 0 (0, 8.3)       | >0.99 | >0.99 |
| <i>FGF19</i>  | 5  | 1/5 (20)  | 20/87 (23) | 0.8 (0.02, 9.1)  | >0.99 | >0.99 |
| <i>FGF3</i>   | 5  | 1/5 (20)  | 20/87 (23) | 0.8 (0.02, 9.1)  | >0.99 | >0.99 |

Pooled dataset includes evaluable patients from the current FIGHT-207 study (n=72) and the open-label, phase 1/2, first-in-human FIGHT-101 study (n=20) irrespective of histology with *FGFR* fusions/rearrangements or mutations, pemigatinib  $\geq 13.5$  mg treatment, and best overall responses reported

\* Fisher's exact test, two-sided, for count data.

† False discovery rate correction for multiple testing.

**Supplementary Table 6. Pooled Analysis of Baseline Co-Alterations Associated with Response in Tumor Tissue From Patients With Cholangiocarcinoma in FIGHT-207 and FIGHT-202**

| Gene          | N Altered | Objective Response, n/N (%) |             | Odds Ratio (95% CI) | P*           | Q†    |
|---------------|-----------|-----------------------------|-------------|---------------------|--------------|-------|
|               |           | Altered                     | Unaltered   |                     |              |       |
| <i>TP53</i>   | 9         | 0/9 (0)                     | 46/106 (43) | 0 (0, 0.7)          | <b>0.011</b> | 0.91  |
| <i>CDKN2B</i> | 17        | 3/17 (18)                   | 43/98 (44)  | 0.3 (0.05, 1.1)     | 0.059        | >0.99 |
| <i>BAP1</i>   | 44        | 22/44 (50)                  | 24/71 (34)  | 2.0 (0.9, 4.5)      | 0.12         | >0.99 |
| <i>CDKN2A</i> | 23        | 6/23 (26)                   | 40/92 (44)  | 0.5 (0.1, 1.4)      | 0.16         | >0.99 |
| <i>TERT</i>   | 3         | 0/3 (0)                     | 46/112 (41) | 0 (0, 3.6)          | 0.3          | >0.99 |
| <i>LYN</i>    | 3         | 2/3 (67)                    | 44/112 (39) | 3.1 (0.2, 185)      | 0.6          | >0.99 |
| <i>MTAP</i>   | 4         | 1/4 (25)                    | 45/111 (41) | 0.5 (0.01, 6.4)     | 0.7          | >0.99 |
| <i>IDH1</i>   | 7         | 2/7 (29)                    | 44/108 (41) | 0.6 (0.05, 3.8)     | 0.7          | >0.99 |
| <i>MCL1</i>   | 8         | 4/8 (50)                    | 42/107 (39) | 1.5 (0.3, 8.8)      | 0.71         | >0.99 |
| <i>PIK3CA</i> | 10        | 3/10 (30)                   | 43/105 (41) | 0.6 (0.1, 2.9)      | 0.74         | >0.99 |
| <i>PBRM1</i>  | 10        | 3/10 (30)                   | 43/105 (41) | 0.6 (0.1, 2.9)      | 0.74         | >0.99 |
| <i>MYC</i>    | 9         | 3/9 (33)                    | 43/106 (41) | 0.7 (0.1, 3.7)      | 0.74         | >0.99 |
| <i>PTEN</i>   | 5         | 2/5 (40)                    | 44/110 (40) | 1.0 (0.08, 9.1)     | >0.99        | >0.99 |
| <i>LRP1B</i>  | 3         | 1/3 (33)                    | 45/112 (40) | 0.8 (0.01, 14.7)    | >0.99        | >0.99 |
| <i>FANCG</i>  | 3         | 1/3 (33)                    | 45/112 (40) | 0.8 (0.01, 14.7)    | >0.99        | >0.99 |
| <i>FOXP1</i>  | 3         | 1/3 (33)                    | 45/112 (40) | 0.8 (0.01, 14.7)    | >0.99        | >0.99 |

Pooled dataset includes evaluable patients from the current FIGHT-207 study (n=11) and the open-label, phase 2 FIGHT-202 study (n=104) with cholangiocarcinoma and best overall responses reported.

\* Fisher's exact test, two-sided, for count data.

† False discovery rate correction for multiple testing.

**Supplementary Table 7. Pooled Analysis of Baseline Co-Alterations Associated with Response in Tumor Tissue From Patients With Urothelial Carcinoma in FIGHT-207 and FIGHT-201**

| Gene           | N Altered | Objective Response, n/N (%) |             | Odds Ratio (95% CI) | P*           | Q†    |
|----------------|-----------|-----------------------------|-------------|---------------------|--------------|-------|
|                |           | Altered                     | Unaltered   |                     |              |       |
| <i>TSC1</i>    | 36        | 3/36 (8)                    | 33/126 (26) | 0.3 (0.05, 0.9)     | <b>0.023</b> | >0.99 |
| <i>CDKN1A</i>  | 22        | 1/22 (5)                    | 35/140 (25) | 0.1 (0, 1.0)        | <b>0.029</b> | >0.99 |
| <i>MLL2</i>    | 37        | 12/37 (32)                  | 24/125 (19) | 2.0 (0.8, 4.9)      | 0.11         | >0.99 |
| <i>EP300</i>   | 17        | 1/17 (6.0)                  | 35/145 (24) | 0.2 (0, 1.4)        | 0.12         | >0.99 |
| <i>ARID1A</i>  | 34        | 11/34 (32)                  | 25/128 (20) | 2.0 (0.8, 4.9)      | 0.16         | >0.99 |
| <i>NCOR1</i>   | 7         | 3/7 (43)                    | 33/155 (21) | 2.8 (0.4, 17.1)     | 0.18         | >0.99 |
| <i>CCND1</i>   | 14        | 1/14 (7)                    | 35/148 (24) | 0.3 (0.01, 1.8)     | 0.20         | >0.99 |
| <i>FGF19</i>   | 14        | 1/14 (7)                    | 35/148 (24) | 0.3 (0.01, 1.8)     | 0.20         | >0.99 |
| <i>SMARCA4</i> | 8         | 0/8 (0)                     | 36/154 (23) | 0 (0, 2.0)          | 0.20         | >0.99 |
| <i>LRP1B</i>   | 8         | 0/8 (0)                     | 36/154 (23) | 0 (0, 2.0)          | 0.20         | >0.99 |
| <i>CDKN2B</i>  | 89        | 23/89 (26)                  | 13/73 (18)  | 1.6 (0.7, 3.8)      | 0.26         | >0.99 |
| <i>STAG2</i>   | 37        | 11/37 (30)                  | 25/125 (20) | 1.7 (0.7, 4.1)      | 0.26         | >0.99 |

|               |     |             |                  |                 |      |       |
|---------------|-----|-------------|------------------|-----------------|------|-------|
| <i>ATM</i>    | 11  | 4/11 (36)   | 32/151<br>(21.2) | 2.1 (0.4, 8.9)  | 0.26 | >0.99 |
| <i>MLL3</i>   | 23  | 7/23 (30)   | 29/139<br>(21)   | 1.7 (0.5, 4.8)  | 0.29 | >0.99 |
| <i>FGF3</i>   | 12  | 1/12 (8)    | 35/150<br>(23)   | 0.3 (0.01, 2.2) | 0.30 | >0.99 |
| <i>GNA13</i>  | 5   | 2/5 (40)    | 34/157<br>(22)   | 2.4 (0.2, 21.8) | 0.31 | >0.99 |
| <i>PIK3CA</i> | 28  | 4/28 (14)   | 32/134<br>(24)   | 0.5 (0.1, 1.7)  | 0.33 | >0.99 |
| <i>CDKN2A</i> | 100 | 25/100 (25) | 11/62 (18)       | 1.5 (0.7, 3.8)  | 0.33 | >0.99 |
| <i>ZNF703</i> | 7   | 0/7 (0)     | 36/155<br>(23)   | 0 (0, 2.4)      | 0.35 | >0.99 |
| <i>CREBBP</i> | 16  | 5/16 (31)   | 31/146<br>(21)   | 1.7 (0.4, 5.7)  | 0.35 | >0.99 |
| <i>DM6A</i>   | 56  | 10/56 (18)  | 26/106<br>(25)   | 0.7 (0.3, 1.6)  | 0.43 | >0.99 |
| <i>FGF4</i>   | 11  | 1/11 (9)    | 35/151<br>(23)   | 0.3 (0.01, 2.5) | 0.46 | >0.99 |
| <i>PTEN</i>   | 10  | 1/10 (10)   | 35/152<br>(23)   | 0.4 (0.01, 2.9) | 0.46 | >0.99 |
| <i>SF3B1</i>  | 5   | 0/5 (0)     | 36/157<br>(23)   | 0 (0, 3.8)      | 0.59 | >0.99 |
| <i>MDM2</i>   | 25  | 4/25 (16)   | 32/137<br>(23)   | 0.6 (0.2, 2.1)  | 0.60 | >0.99 |
| <i>FRS2</i>   | 25  | 4/25 (16)   | 32/137<br>(23)   | 0.6 (0.2, 2.1)  | 0.60 | >0.99 |
| <i>CHEK2</i>  | 7   | 2/7 (29)    | 34/155<br>(22)   | 1.4 (0.1, 9.2)  | 0.65 | >0.99 |

|              |    |           |                |                 |       |       |
|--------------|----|-----------|----------------|-----------------|-------|-------|
| <i>TP53</i>  | 42 | 8/42 (19) | 28/120<br>(23) | 0.8 (0.3, 2.0)  | 0.67  | >0.99 |
| <i>RB1</i>   | 9  | 1/9 (11)  | 35/153<br>(23) | 0.4 (0.01, 3.3) | 0.69  | >0.99 |
| <i>ERBB2</i> | 9  | 1/9 (11)  | 35/153<br>(23) | 0.4 (0.01, 3.3) | 0.69  | >0.99 |
| <i>FAT1</i>  | 8  | 1/8 (13)  | 35/154<br>(23) | 0.5 (0.01, 4.0) | 0.69  | >0.99 |
| <i>MUTYH</i> | 6  | 1/6 (17)  | 35/156<br>(22) | 0.7 (0.01, 6.5) | >0.99 | >0.99 |
| <i>MTAP</i>  | 7  | 1/7 (14)  | 35/155<br>(23) | 0.6 (0.01, 5.0) | >0.99 | >0.99 |
| <i>FBXW7</i> | 10 | 2/10 (20) | 34/152<br>(22) | 0.9 (0.09, 4.6) | >0.99 | >0.99 |
| <i>BAP1</i>  | 5  | 1/5 (20)  | 35/157<br>(22) | 0.9 (0.02, 9.2) | >0.99 | >0.99 |

Pooled dataset includes evaluable patients from the current FIGHT-207 study (n=13) and the open-label, phase 2 FIGHT-201 study (n=149) with urothelial carcinoma and best overall responses reported.

\* Fisher's exact test, two-sided, for count data.

† False discovery rate correction for multiple testing.

**Supplementary Table 8. Principal investigators and institutions participating in FIGHT-207**

| <b>Principal Investigator</b> | <b>Institution</b>                                                              | <b>Institution Country</b> |
|-------------------------------|---------------------------------------------------------------------------------|----------------------------|
| Eugene Ahn                    | Cancer Treatment Centers of America                                             | USA                        |
| Myung-Ju Ahn                  | Samsung Medical Center                                                          | Republic of Korea          |
| Jordi Rodon                   | The University of Texas MD Anderson Cancer Center                               | USA                        |
| Jerome Alexandre              | Hospital Cochin Cancerologie                                                    | France                     |
| Salwan Al-Mutar               | UT Southwestern Medical Center                                                  | USA                        |
| Daisuke Aoki                  | Keio University Hospital                                                        | Japan                      |
| Andrea Ardizzoni              | L'Azienda Ospedaliero-Universitaria di Bologna Policlinico S. Orsola – Malpighi | Italy                      |
| Hendrik-Tobias Arkenau        | Sarah Cannon Research Institute                                                 | UK                         |
| Gil Bar-Sela                  | Ha Emek Medical Center                                                          | Israel                     |
| Stefan Boeck                  | University Hospital Grosshadern Munich                                          | Germany                    |
| Esmā Bouzid                   | Centre Antoine Laccassagne                                                      | France                     |
| John Bridgewater              | University College London Hospitals NHS Foundation Trust                        | UK                         |
| Silvia Damian                 | Comitato Etico Fondazione IRCCS Istituto Nazionale dei Tumori Milano            | Italy                      |
| Emanuela Dellaquila           | I.F.O. Istituto Nazionale Tumori Regina Elena                                   | Italy                      |
| Muhammad Furqan               | University of Iowa Hospital and Clinics                                         | USA                        |
| Masayuki Furukawa             | National Hospital Organization Kyushu Cancer Center                             | Japan                      |
| Ana Galeote Miguel            | Hospital Regional Universitario de Malaga                                       | Spain                      |
| Javier Garcia Corbacho        | Hospital Clinic Barcelona Main                                                  | Spain                      |

|                            |                                                                                        |                   |
|----------------------------|----------------------------------------------------------------------------------------|-------------------|
| Jesus Garcia-Donas Jimenez | Centro Integral Oncologico Clara Campal                                                | Spain             |
| Carlos Alberto Gomez-Roca  | Universitaire du Cancer de Toulouse<br>Institut Claudius Regaud IUCT<br>Oncopole       | France            |
| Lipika Goyal               | Massachusetts General Hospital                                                         | USA               |
| Vikas Gupta                | Comprehensive Cancer Center of Nevada                                                  | USA               |
| Alice Hervieu              | Centre Georges Francois Leclerc                                                        | France            |
| Seock-Ah Im                | Seoul National University Hospital                                                     | Republic of Korea |
| Hiroo Imai                 | Tohoku University Hospital                                                             | Japan             |
| Antoine Italiano           | Institut Bergonie                                                                      | France            |
| Oscar Jose Juan Vidal      | Hospital Universitari i Politecnic La Fe                                               | Spain             |
| Santosh Kesari             | Providence St. Joseph Hospital<br>Orange Center for Cancer Prevention<br>and Treatment | USA               |
| Fachyi Lee                 | Chao Family Comprehensive Cancer<br>Center University of California, Irvine            | USA               |
| Amit Mahipal               | Mayo Clinic                                                                            | USA               |
| Marc Matrana               | Ochsner Clinic Foundation, Ochsner<br>Cancer Institute                                 | USA               |
| Timothy McCarthy           | Virginia Cancer Specialists, PC                                                        | USA               |
| Niharika Mettu             | Duke University Hospital                                                               | USA               |
| Hironobu Minami            | Kobe University Hospital                                                               | Japan             |
| Mariano Ponz-Sarvise       | Clinica Universidad de Navarra                                                         | Spain             |
| Fernando Rivera Herrero    | Hospital Universitario Marques de Valdecilla                                           | Spain             |

|                    |                                                         |                   |
|--------------------|---------------------------------------------------------|-------------------|
| Caio Rocha Lima    | Wake Forest University, Center for Dermatology Research | USA               |
| Clorinda Schettino | Istituto Nazionale Tumori IRCCS Fondazione Pascale      | Italy             |
| Richard Siegel     | Illinois Cancer Specialists                             | USA               |
| Sung Hoon Sim      | National Cancer Center                                  | Republic of Korea |
| Iben Spanggaard    | Rigshospitalet                                          | Denmark           |
| Salomon Stemmer    | Rabin Medical Center – Beilinson Hospital               | Israel            |
| Shinji Takeuchi    | Kanazawa University Hospital                            | Japan             |
| Makoto Ueno        | Kanagawa Cancer Center                                  | Japan             |
| Susanna Ulahannan  | Oklahoma University Medical Center                      | USA               |
| Daniel Vaena       | The West Clinic PC                                      | USA               |
| Maria Vieito       | Hospital General Universitario Vall d'Hebron            | Spain             |
| Tomoya Yokota      | Shizuoka Cancer Center                                  | Japan             |

---



**Supplementary Figure 1. Comparison of *FGFR* Alterations (A) and Co-Alterations (B) Detected in Patients With Both Tissue (Archival or Baseline) and ctDNA (Baseline) NGS Samples (Cohorts A, B, and C; N=89).** Key variant genes and variant gene pathways detected in patients with NGS analysis of both archival or baseline tissue samples and baseline ctDNA samples are shown. Concordant gene alterations were detected in both ctDNA and tissue from the same patient. Discordant gene alterations (ie, detection of *FGFR2* fusions with different partners in ctDNA and tissue from the same patient) were detected in a minority of patient samples. MAPK pathway includes *KRAS*, *NRAS*, and *BRAF*. ctDNA, circulating tumor DNA; FGFR, fibroblast growth factor receptor; NGS, next-generation sequencing.

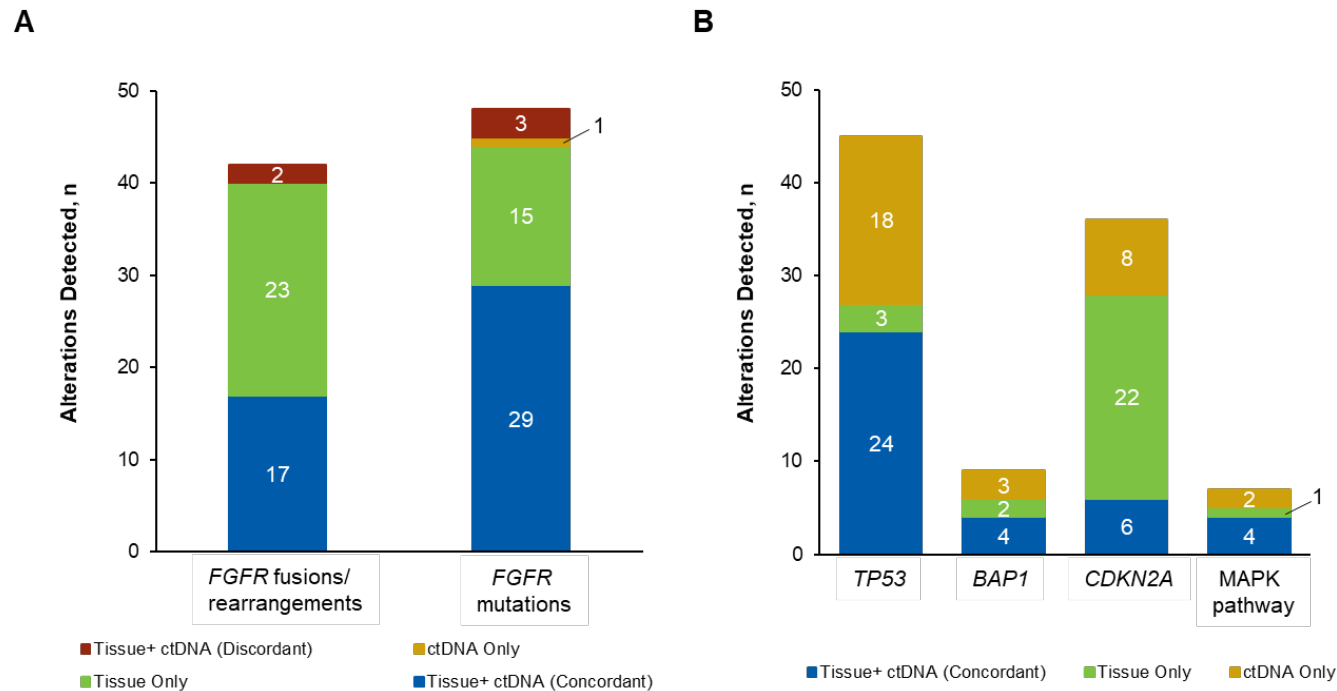

Supplement: 41591_2024_2934_MOESM1_ESM.pdf [file 41591_2024_2934_MOESM1_ESM.pdf]
