# Supplementary material for: Pemigatinib in previously treated solid tumors with activating FGFR1–FGFR3 alterations: phase 2 FIGHT-207 basket trial
Source: PubMed Central journal article supplement (PMC11186762; doi:10.1038/s41591-024-02934-7), 2024-05-06
Supplement: 41591_2024_2934_MOESM2_ESM.pdf [file 41591_2024_2934_MOESM2_ESM.pdf]

## Reporting Summary

Nature Portfolio wishes to improve the reproducibility of the work that we publish. This form provides structure for consistency and transparency in reporting. For further information on Nature Portfolio policies, see our [Editorial Policies](#) and the [Editorial Policy Checklist](#).

### Statistics

For all statistical analyses, confirm that the following items are present in the figure legend, table legend, main text, or Methods section.

- | n/a                                 | Confirmed                                                                                                                                                                                                                                                                                      |
|-------------------------------------|------------------------------------------------------------------------------------------------------------------------------------------------------------------------------------------------------------------------------------------------------------------------------------------------|
| <input type="checkbox"/>            | <input checked="" type="checkbox"/> The exact sample size ( $n$ ) for each experimental group/condition, given as a discrete number and unit of measurement                                                                                                                                    |
| <input type="checkbox"/>            | <input checked="" type="checkbox"/> A statement on whether measurements were taken from distinct samples or whether the same sample was measured repeatedly                                                                                                                                    |
| <input type="checkbox"/>            | <input checked="" type="checkbox"/> The statistical test(s) used AND whether they are one- or two-sided<br><i>Only common tests should be described solely by name; describe more complex techniques in the Methods section.</i>                                                               |
| <input checked="" type="checkbox"/> | <input type="checkbox"/> A description of all covariates tested                                                                                                                                                                                                                                |
| <input type="checkbox"/>            | <input checked="" type="checkbox"/> A description of any assumptions or corrections, such as tests of normality and adjustment for multiple comparisons                                                                                                                                        |
| <input type="checkbox"/>            | <input checked="" type="checkbox"/> A full description of the statistical parameters including central tendency (e.g. means) or other basic estimates (e.g. regression coefficient) AND variation (e.g. standard deviation) or associated estimates of uncertainty (e.g. confidence intervals) |
| <input type="checkbox"/>            | <input checked="" type="checkbox"/> For null hypothesis testing, the test statistic (e.g. $F$ , $t$ , $r$ ) with confidence intervals, effect sizes, degrees of freedom and $P$ value noted<br><i>Give <math>P</math> values as exact values whenever suitable.</i>                            |
| <input checked="" type="checkbox"/> | <input type="checkbox"/> For Bayesian analysis, information on the choice of priors and Markov chain Monte Carlo settings                                                                                                                                                                      |
| <input checked="" type="checkbox"/> | <input type="checkbox"/> For hierarchical and complex designs, identification of the appropriate level for tests and full reporting of outcomes                                                                                                                                                |
| <input checked="" type="checkbox"/> | <input type="checkbox"/> Estimates of effect sizes (e.g. Cohen's $d$ , Pearson's $r$ ), indicating how they were calculated                                                                                                                                                                    |

*Our web collection on [statistics for biologists](#) contains articles on many of the points above.*

### Software and code

Policy information about [availability of computer code](#)

- |                 |                                                                                                                                                       |
|-----------------|-------------------------------------------------------------------------------------------------------------------------------------------------------|
| Data collection | Clinical data were entered into electronic case report form per the protocol. Data were managed by an electronic data capture system.                 |
| Data analysis   | Data analyses were performed according to the statistical analysis plan using SAS v9 or higher. Translational data analyses were performed in R 4.1.1 |

For manuscripts utilizing custom algorithms or software that are central to the research but not yet described in published literature, software must be made available to editors and reviewers. We strongly encourage code deposition in a community repository (e.g. GitHub). See the Nature Portfolio [guidelines for submitting code & software](#) for further information.

### Data

Policy information about [availability of data](#)

All manuscripts must include a [data availability statement](#). This statement should provide the following information, where applicable:

- Accession codes, unique identifiers, or web links for publicly available datasets
- A description of any restrictions on data availability
- For clinical datasets or third party data, please ensure that the statement adheres to our [policy](#)

Incyte Corporation (Wilmington, DE, USA) is committed to data sharing that advances science and medicine while protecting patient privacy. The study protocol with confidential information redacted is provided in the Supplementary Information. Qualified external scientific researchers may request anonymized datasets owned by Incyte for the purpose of conducting legitimate scientific research. Researchers may request anonymized datasets from any interventional study (except

Phase 1 studies) for which the product and indication have been approved on or after 1 January 2020 in at least one major market (eg, US, EU, JPN). Data will be available for request after the primary publication or 2 years after the study has ended. Information on Incyte's clinical trial data sharing policy and instructions for submitting clinical trial data requests are available at: <https://www.incyte.com/Portals/0/Assets/Compliance%20and%20Transparency/clinical-trial-data-sharing.pdf?ver=2020-05-21-132838-960>

## Research involving human participants, their data, or biological material

Policy information about studies with [human participants or human data](#). See also policy information about [sex, gender \(identity/presentation\), and sexual orientation](#) and [race, ethnicity and racism](#).

### Reporting on sex and gender

Sex and/or gender were not considered in the study design or statistical analysis plan because fibroblast growth factor receptor (FGFR) alterations across histologies have not been shown to consistently predominate in one sex (Murugesan, et al. 2022). Patients were recruited into the study irrespective of sex or gender. The sex of the patients was self-reported and gender was not collected. No sex- or gender-based analyses were performed.

### Reporting on race, ethnicity, or other socially relevant groupings

Self-reported race and ethnicity data were collected

### Population characteristics

Patients had previously treated, advanced solid tumors with alterations in FGFR genes. Median age among efficacy-evaluable patients was 62 years; 57% were women, 69% were White, and 23% were Asian. The most commonly represented histologies were cholangiocarcinoma (16%), urothelial tract/bladder cancer (11%), and glioblastoma (9%). Efficacy-evaluable patients were divided into 3 cohorts: FGFR fusions/rearrangements (cohort A; n=49), FGFR actionable single nucleotide variants (cohort B; n=32), FGFR kinase domain mutations and variants of unknown significance (cohort C; n=26). Approximately half of the efficacy evaluable population received prior radiation (45%) and prior surgery for cancer (57%). Nearly all patients received prior systemic therapy (88%).

### Recruitment

Eligible patients were ≥18 years old with a histologically or cytologically confirmed advanced/metastatic or surgically unresectable solid tumor and radiographically measurable disease per RECIST v1.1 or RANO. Patients were required to have a documented FGFR1–3 mutation or fusion/rearrangement, disease progression after ≥1 line of prior systemic therapy, no therapy available likely to provide clinical benefit, Eastern Cooperative Oncology Group performance status ≤2, a baseline tumor specimen, and willingness to avoid pregnancy or fathering children. Key exclusion criteria were prior treatment with a selective FGFR inhibitor, clinically significant corneal or retinal disorder, evidence of ectopic mineralization or calcification, and protocol-defined abnormal laboratory values. A full list of patient selection criteria are included in the Methods section.

The study was mainly conducted with sites that had previously worked in other pemigatinib studies in patients with cholangiocarcinoma and bladder cancer, which may explain the relatively high number of patients with these diseases in FIGHT-207. The protocol, however, had provision to cap certain tumor types including cholangiocarcinoma and bladder cancer, as well as FGFR1-3 alterations to allow representation of multiple tumor types and analysis being impacted by the overrepresentation of any individual tumor type.

Further, patients were enrolled by the study sites after molecular tumor board review and through referrals from peers. Referral letters detailing key inclusion criteria for the clinical trial were sent by Investigative sites to other departments within the study hospitals and to peers.

### Ethics oversight

The study was performed in accordance with the International Council for Harmonisation Good Clinical Practice, the principles embodied by the Declaration of Helsinki, and local regulatory requirements. The study protocol was approved by the institutional review board of each study site before patient enrollment. All patients provided written informed consent prior to screening. A list of investigators and institutions participating in the study is provided in the Supplementary Information.

Note that full information on the approval of the study protocol must also be provided in the manuscript.

## Field-specific reporting

Please select the one below that is the best fit for your research. If you are not sure, read the appropriate sections before making your selection.

Life sciences  Behavioural & social sciences  Ecological, evolutionary & environmental sciences

For a reference copy of the document with all sections, see [nature.com/documents/nr-reporting-summary-flat.pdf](https://nature.com/documents/nr-reporting-summary-flat.pdf)

## Life sciences study design

All studies must disclose on these points even when the disclosure is negative.

### Sample size

Approximately 60 and 90 patients were planned for cohort A and B respectively. Assuming objective response rates (ORRs) of 35% in cohort A and 30% in cohort B, respectively, 60 and 90 patients were needed to ensure ≥90% power to reject the null hypothesis of ORR ≤15% with a 1-sided test at the overall 0.025 level of significance. In cohort C, ≈20 patients were enrolled to provide ≥80% chance of observing at least 4 responders if the underlying ORR were 30%.

### Data exclusions

There were 4 patients from whom FGFR alterations could not be centrally confirmed. Per the protocol, these patients were excluded from the efficacy analysis but included in the safety analysis.

|               |                                                                                                                                                                                                                                                                                                                                                                                                                                                                                                                                                                                                                                                        |
|---------------|--------------------------------------------------------------------------------------------------------------------------------------------------------------------------------------------------------------------------------------------------------------------------------------------------------------------------------------------------------------------------------------------------------------------------------------------------------------------------------------------------------------------------------------------------------------------------------------------------------------------------------------------------------|
| Replication   | No attempts were made to replicate the study findings as this was an exploratory, phase 2 study. Extensive demographic and clinical characteristics of enrolled patients are provided to support comparisons between this population with patients enrolled in other studies or included in other datasets.                                                                                                                                                                                                                                                                                                                                            |
| Randomization | No randomization was undertaken for this open-label study. This study is a single-arm, open label study where all participants received the same treatment regimens. The cohort was assigned based on the FGFR mutations or translocations, and no comparisons were made between cohorts. Therefore, randomization was not needed.<br>This is not relevant to our study. This study is a single-arm, open label study where all participants will receive the same treatment regimens. The cohort was assigned based on the FGFR mutations or translocations, and no comparisons will be made between cohorts. Therefore, randomization is not needed. |
| Blinding      | This study was designed to be open-label; therefore, no blinding was performed.                                                                                                                                                                                                                                                                                                                                                                                                                                                                                                                                                                        |

## Reporting for specific materials, systems and methods

We require information from authors about some types of materials, experimental systems and methods used in many studies. Here, indicate whether each material, system or method listed is relevant to your study. If you are not sure if a list item applies to your research, read the appropriate section before selecting a response.

### Materials & experimental systems

| n/a                                 | Included in the study                                  |
|-------------------------------------|--------------------------------------------------------|
| <input checked="" type="checkbox"/> | <input type="checkbox"/> Antibodies                    |
| <input checked="" type="checkbox"/> | <input type="checkbox"/> Eukaryotic cell lines         |
| <input checked="" type="checkbox"/> | <input type="checkbox"/> Palaeontology and archaeology |
| <input checked="" type="checkbox"/> | <input type="checkbox"/> Animals and other organisms   |
| <input type="checkbox"/>            | <input checked="" type="checkbox"/> Clinical data      |
| <input checked="" type="checkbox"/> | <input type="checkbox"/> Dual use research of concern  |
| <input checked="" type="checkbox"/> | <input type="checkbox"/> Plants                        |

### Methods

| n/a                                 | Included in the study                                      |
|-------------------------------------|------------------------------------------------------------|
| <input checked="" type="checkbox"/> | <input type="checkbox"/> ChIP-seq                          |
| <input checked="" type="checkbox"/> | <input type="checkbox"/> Flow cytometry                    |
| <input type="checkbox"/>            | <input checked="" type="checkbox"/> MRI-based neuroimaging |

## Clinical data

Policy information about [clinical studies](#)

All manuscripts should comply with the ICMJE [guidelines for publication of clinical research](#) and a completed [CONSORT checklist](#) must be included with all submissions.

|                             |                                                                                                                                                                                                                                                                                                                                                                                                                                                                                                                                                                                                                                                                                                                                                                                                                                                                                                                                                                                                                                                                            |
|-----------------------------|----------------------------------------------------------------------------------------------------------------------------------------------------------------------------------------------------------------------------------------------------------------------------------------------------------------------------------------------------------------------------------------------------------------------------------------------------------------------------------------------------------------------------------------------------------------------------------------------------------------------------------------------------------------------------------------------------------------------------------------------------------------------------------------------------------------------------------------------------------------------------------------------------------------------------------------------------------------------------------------------------------------------------------------------------------------------------|
| Clinical trial registration | ClinicalTrials.gov Identifier: NCT03822117                                                                                                                                                                                                                                                                                                                                                                                                                                                                                                                                                                                                                                                                                                                                                                                                                                                                                                                                                                                                                                 |
| Study protocol              | The full study protocol is provided as Supplementary Information. Some confidential information is redacted.                                                                                                                                                                                                                                                                                                                                                                                                                                                                                                                                                                                                                                                                                                                                                                                                                                                                                                                                                               |
| Data collection             | The study was conducted at 48 hospitals or academic centers in 10 countries (Denmark, France, Germany, Israel, Italy, Japan, Republic of Korea, Spain, United Kingdom, United States). A full list of investigators and study sites is provided in the Supplementary Information. Patients were enrolled between October 17, 2019 and July 12, 2021. The study was completed on March 29, 2022.                                                                                                                                                                                                                                                                                                                                                                                                                                                                                                                                                                                                                                                                            |
| Outcomes                    | The primary endpoints were ORRs in cohorts A and B as determined by an independent review committee (IRC). ORR was defined as the percentage of patients who achieved complete response or partial response per RECIST v1.1 or RANO. Disease was assessed by computed tomography or magnetic resonance imaging (MRI) at baseline, every 3 cycles, and end of treatment. Secondary endpoints were IRC-assessed progression-free survival (time from first dose to progressive disease or death, whichever is first) in cohorts A and B, respectively, duration of response (time from the first assessment of complete response or partial response until progressive disease or death, whichever is first) in cohorts A and B, respectively, overall survival (time from first dose to death) in cohorts A and B, respectively, and safety and tolerability as assessed by the incidence and severity of treatment-emergent adverse events (AEs) and treatment-related AEs according to the National Cancer Institute Common Terminology Criteria for Adverse Events v5.0. |

## Plants

|                       |                                    |
|-----------------------|------------------------------------|
| Seed stocks           | Plants were not used in this study |
| Novel plant genotypes | Plants were not used in this study |
| Authentication        | Plants were not used in this study |

## Magnetic resonance imaging

### Experimental design

|                                 |                                                                                                                                                                                                                                                                                                                                                                                                                                                                                                                                                                                                                                                                                              |
|---------------------------------|----------------------------------------------------------------------------------------------------------------------------------------------------------------------------------------------------------------------------------------------------------------------------------------------------------------------------------------------------------------------------------------------------------------------------------------------------------------------------------------------------------------------------------------------------------------------------------------------------------------------------------------------------------------------------------------------|
| Design type                     | Whole brain MRI was used as an imaging tool to assess tumor responses in patients with central nervous system (CNS) tumors in FIGHT-207.                                                                                                                                                                                                                                                                                                                                                                                                                                                                                                                                                     |
| Design specifications           | Sites performed MRIs for patients with CNS tumors in accordance with the sponsor-defined imaging charter. The sponsor did not standardize MRIs across sites. Tumor responses were assessed by independent central radiologic review according to RANO criteria. Briefly, sites sent deidentified images to the independent reader on CDs or DVDs in DICOM format. The independent reader checked the images for technical quality (e.g., absence of patient motion or artifact, presence of whole anatomical region and all timepoints), compliance with imaging guidelines, and consistent imaging across multiple timepoints. The independent reader then reviewed quality-checked images. |
| Behavioral performance measures | Behavioral performance was not assessed in FIGHT-207                                                                                                                                                                                                                                                                                                                                                                                                                                                                                                                                                                                                                                         |

### Acquisition

|                               |                                                                                                                                                                                                                             |
|-------------------------------|-----------------------------------------------------------------------------------------------------------------------------------------------------------------------------------------------------------------------------|
| Imaging type(s)               | Brain tumor imaging protocol                                                                                                                                                                                                |
| Field strength                | 1.5T, 3T                                                                                                                                                                                                                    |
| Sequence & imaging parameters | <ul style="list-style-type: none"> <li>• Sagittal/axial 3D T1w pre-contrast</li> <li>• Axial 2D FLAIR (TSE)</li> <li>• Axial 2D DWI</li> <li>• Axial 2D T2w (TSE)</li> <li>• Sagittal/axial 3D T1w post-contrast</li> </ul> |
| Area of acquisition           | Whole brain                                                                                                                                                                                                                 |
| Diffusion MRI                 | <input type="checkbox"/> Used <input checked="" type="checkbox"/> Not used                                                                                                                                                  |

### Preprocessing

|                            |                                                                                                                                                    |
|----------------------------|----------------------------------------------------------------------------------------------------------------------------------------------------|
| Preprocessing software     | Preprocessing, normalization, noise and artifact removal, and volume censoring were performed by sites. Details were not collected by the sponsor. |
| Normalization              | Preprocessing, normalization, noise and artifact removal, and volume censoring were performed by sites. Details were not collected by the sponsor. |
| Normalization template     | Preprocessing, normalization, noise and artifact removal, and volume censoring were performed by sites. Details were not collected by the sponsor. |
| Noise and artifact removal | Preprocessing, normalization, noise and artifact removal, and volume censoring were performed by sites. Details were not collected by the sponsor. |
| Volume censoring           | Preprocessing, normalization, noise and artifact removal, and volume censoring were performed by sites. Details were not collected by the sponsor. |

### Statistical modeling & inference

|                                           |                                                                                                       |
|-------------------------------------------|-------------------------------------------------------------------------------------------------------|
| Model type and settings                   | Statistical modeling and inference was not performed                                                  |
| Effect(s) tested                          | Statistical modeling and inference was not performed                                                  |
| Specify type of analysis:                 | <input type="checkbox"/> Whole brain <input type="checkbox"/> ROI-based <input type="checkbox"/> Both |
| Statistic type for inference              | Statistical modeling and inference was not performed                                                  |
| (See <a href="#">Eklund et al. 2016</a> ) |                                                                                                       |
| Correction                                | Statistical modeling and inference was not performed                                                  |

### Models & analysis

|                                     |                                                                       |
|-------------------------------------|-----------------------------------------------------------------------|
| n/a                                 | Involvement in the study                                              |
| <input checked="" type="checkbox"/> | <input type="checkbox"/> Functional and/or effective connectivity     |
| <input checked="" type="checkbox"/> | <input type="checkbox"/> Graph analysis                               |
| <input checked="" type="checkbox"/> | <input type="checkbox"/> Multivariate modeling or predictive analysis |
